# Supplementary material for: A carbon dot-based clay nanocomposite for efficient heavy metal removal
Source: Royal Society of Chemistry journal article supplement (doi:10.1039/d3na00334e), 2023-01-01
Supplement: d3na00334e1.pdf [file d3na00334e1.pdf]

# Supporting Information

## Carbon dots-based clay nanocomposite for efficient heavy metal removal

Khouloud Jlassi<sup>1\*</sup>, Maryam Al Ejji<sup>1</sup>, Abdelgalil Khalaf Ahmed<sup>2</sup>, Hafsa Mutahir<sup>2</sup>, Mostafa H. Sliem<sup>1</sup>, Aboubakr M. Abdullah<sup>1\*</sup>, Mohamed M. Chehimi<sup>3,\*</sup>, Igor Krupa<sup>1</sup>.

1. Center for Advanced Materials, Qatar University, P.O. Box 2713, Doha, Qatar
2. College of Arts and Sciences, Qatar University, P.O. Box 2713, Doha, Qatar
3. Université de Paris, ITODYS, UMR CNRS 7086, 15 rue JA de Baïf, 75013 Paris, France

\*Correspondence:

[khouloud.jlassi@qu.edu.qa](mailto:khouloud.jlassi@qu.edu.qa) (KJ); [abubakr2@yahoo.com](mailto:abubakr2@yahoo.com) (AMA); and [mohamed.chehimi@cnrs.fr](mailto:mohamed.chehimi@cnrs.fr) (MMC)

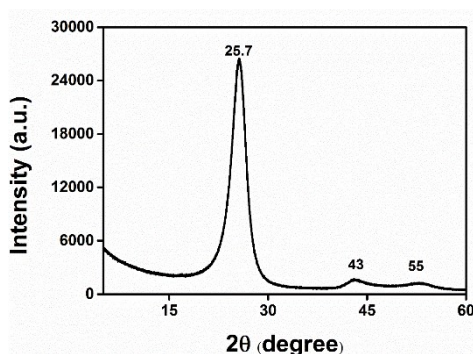

Fig. S1. X-ray diffraction pattern of the graphitic waste

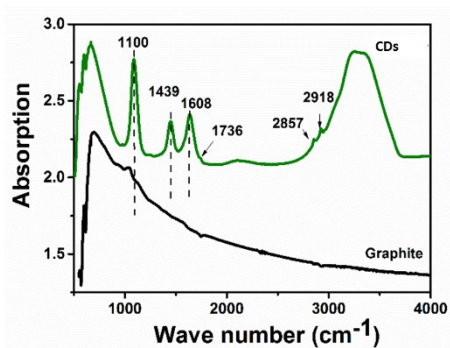

Fig. S2. FTIR of the graphitic waste and resulted in CDs.

Table S1. Calculation of Quantum Yield

|  | Integrated P.L. intensity | Refractive index | Quantum yield |
|--|---------------------------|------------------|---------------|
|  |                           |                  |               |

|                  |             |      |        |
|------------------|-------------|------|--------|
| Quinine sulphate | 403862.308  | 1.33 | 54%    |
| CDs              | 2.14755 E-5 | 1.33 | 28.7 % |

$$\Phi C = 54 \times (2.14755 \text{ E-}5/403862.308) \times (1.332/1.332) \% = 28.7 \%$$

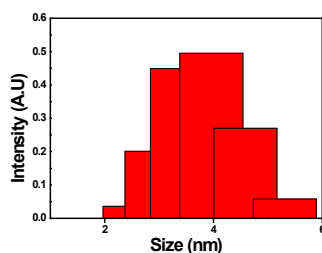

Fig S3. particle size distribution of CDs.

The selectivity test was evaluated in the presence of  $\text{Cu}^{2+}$ ,  $\text{Zn}^{2+}$ , and  $\text{Co}^{2+}$  at pH 8.0, and the relative removal efficiency equals 48, 33, 66, and 95 %, respectively (Fig. S4).

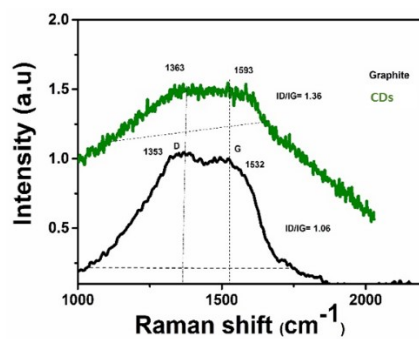

Figure. S4. Raman spectra of graphite waste and CDs derivate.

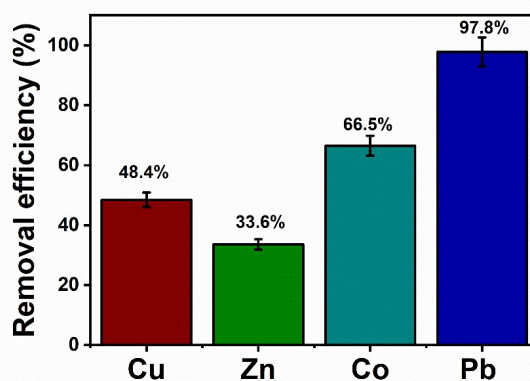

Fig.S5. Selectivity test of B-CDs in presence of 30 ppm of  $\text{Cu}^{2+}$ ,  $\text{Zn}^{2+}$ , and  $\text{Co}^{2+}$  at pH 8.0 and light conditions

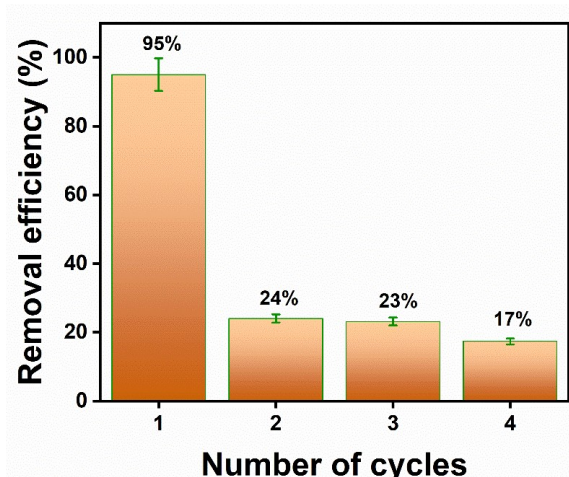

Fig.S6. Effect of regeneration cycles on the removal efficiency of Pb(II) onto B-CDs using  $\text{HNO}_3$  as desorbing agent

#### Chemical stability

To check the chemical stability of B-CDs adsorbent, the latter was dipped in different pH solutions, and the collected dried adsorbents (B-CDs-Pb), were found to be chemically stable, as shown in Fig. S6.

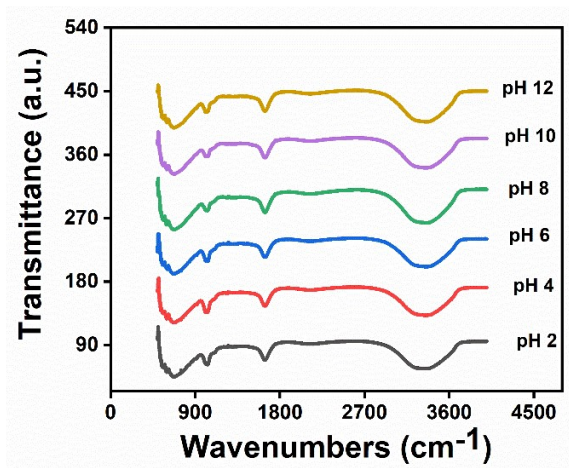

Fig.S7. FTIR spectra of BP-CDs-Pb under different acidic and alkaline conditions

To check the thermal stability of (B-CDs), the Pb removal study was conducted under different temperature, and the FTIR of the collected dried B-CDs-Pb adsorbent show that the used material is thermally stable, as shown in Fig. S7.

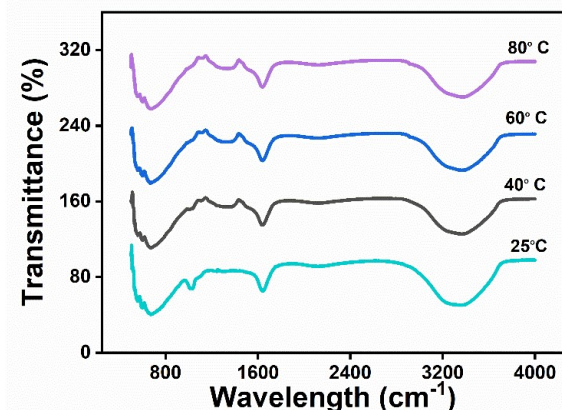

Fig.S8. FTIR spectra of BP-CDs after Pb removal at different under different temperature

First-order and pseudo-second-order models (equations 3, 4) were used to study the variations in adsorption with time<sup>2, 3</sup>. The better correlation coefficient values were noted with the pseudo-second-order model compared to the first-order kinetics (Fig. 5c, S8 and Table 2).

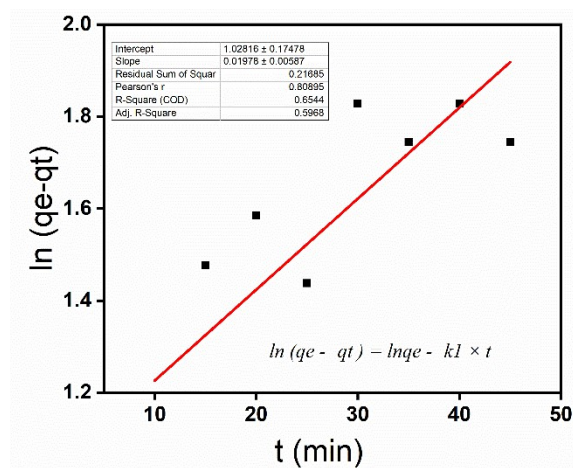

Fig. S9. Pseudo-first -order mode for Pb(II) adsorption using B-CDs under light conditions.

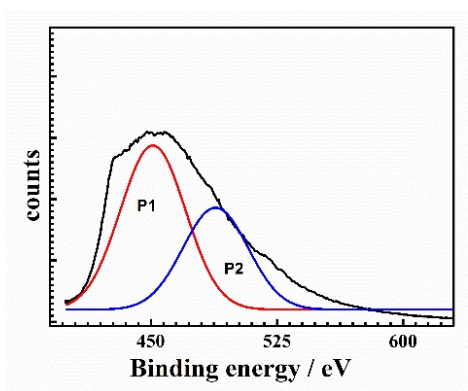

Fig S10. Fitted PL spectrum of the nanoparticles at a 380 nm excitation wavelength.

### Comparison with other adsorbents

Table S2 compares the adsorption capacity of Pb(II) using B-CDs nano hybrid with similar materials previously investigated.

Table S2. Comparison of some adsorbent-based clay materials used for Pb(II) removal

| Adsorbent                                                | Qm /mg g <sup>-1</sup> | Experimental conditions       | t t/min | References       |
|----------------------------------------------------------|------------------------|-------------------------------|---------|------------------|
| Kaolinite clay modified with polyphosphate               | 40                     | pH = 5, 25°C                  | 60      | 1                |
| Bentonite clay                                           | 26.3                   | pH = 4, T = 25 °C             | 60      | 2                |
| Diazonium-based ion-imprinted polymer/clay nanocomposite | 301                    | pH = 7, T = 30 °C             | 30      | 3                |
| Magnetic Sepiolite Clay                                  | 96.15                  | pH = 7, T = 25 °C             | 30      | 4                |
| Attapulgit clay modified with MgO                        | 127.6                  | pH = 5, T = 55 °C             | 1440    | 5                |
| Bentonite modified with Carbon dots                      | 400                    | pH=8<br>T = 25°C<br>UV=365 nm | 45      | <b>This work</b> |

### References:

1. Amer, M. W.; Khalili, F. I.; Awwad, A. M. Journal of environmental chemistry and ecotoxicology **2010**, 2, (1), 001-008.
2. Khan, M.; Hegde, R.; Shabiimam, M. International Journal of Scientific Research and Management **2017**, 5, (7), 5800-5804.
3. Msaadi, R.; Ammar, S.; Chehimi, M. M.; Yagci, Y. European Polymer Journal **2017**, 89, 367-380.
4. Fayazi, M. Analytical and Bioanalytical Chemistry Research **2019**, 6, (1), 125-136.
5. Huang, R.; Lin, Q.; Zhong, Q.; Zhang, X.; Wen, X.; Luo, H. Arabian Journal of Chemistry **2020**, 13, (4), 4994-5008.
